# Supplementary material for: A Neutralizing Aptamer to TGFBR2 and miR-145 Antagonism Rescue Cigarette Smoke- and TGF-β-Mediated CFTR Expression
Source: PubMed Central journal article supplement — Mol Ther. 2018 Dec 6;27(2):442–55. doi: 10.1016/j.ymthe.2018.11.017 (PMC6369566; doi:10.1016/j.ymthe.2018.11.017), 2018-12-06
Supplement: mmc1.pdf [file mmc1.pdf]

YMTHE, Volume 27

## **Supplemental Information**

**A Neutralizing Aptamer to TGFBR2 and miR-145**

**Antagonism Rescue Cigarette Smoke- and**

**TGF- $\beta$ -Mediated CFTR Expression**

**Rajib K. Dutta, Srinivasan Chinnapaiyan, Lawrence Rasmussen, S. Vamsee Raju, and Hoshang J. Unwalla**
